# Supplementary material for: Metagenomics Revealed a New Genus ‘Candidatus Thiocaldithrix dubininis’ gen. nov., sp. nov. and a New Species ‘Candidatus Thiothrix putei’ sp. nov. in the Family Thiotrichaceae, Some Members of Which Have Traits of Both Na+- and H+-Motive Energetics
Source: MDPI journal article supplement (doi:10.3390/ijms241814199), 2023-09-17
Supplement: s1 [file s1]

---

## Supplementary Materials

# Metagenomics Revealed a New Genus ‘Candidatus Thiocaldithrix dubininis’ gen. nov., sp. nov. and a New Species ‘Candidatus Thiothrix putei’ sp. nov. in the Family Thiotrichaceae, Some Members of Which Have Traits of Both Na<sup>+</sup>- and H<sup>+</sup>-Motive Energetics †

Nikolai V. Ravin 1,‡, Maria S. Muntyan 2,\* ,‡, Dmitry D. Smolyakov 3, Tatyana S. Rudenko 3, Alexey V. Beletsky 1,

Andrey V. Mardanov 1 and Margarita Yu. Grabovich 3,\*

<sup>1</sup> Institute of Bioengineering, Research Center of Biotechnology, Russian Academy of Sciences, Leninsky Prospekt, 33-2, 119071 Moscow, Russia; nravin@biengi.ac.ru (N.V.R.); mortu@yandex.ru (A.V.B.); mardanov@biengi.ac.ru (A.V.M.)

<sup>2</sup> Belozersky Institute of Physico-Chemical Biology, Lomonosov Moscow State University, Leninskie Gory, 119991 Moscow, Russia

<sup>3</sup> Department of Biochemistry and Cell Physiology, Voronezh State University, Universitetskaya pl., 1, 394018 Voronezh, Russia; songolifreya@mail.ru (D.D.S.); ipigun6292@gmail.com (T.S.R.)

\* Correspondence: muntyan@genebee.msu.ru (M.S.M.); margarita\_grabov@mail.ru (M.Y.G.)

† The study is dedicated to the memory of the outstanding bioenergeticist Prof. V.P. Skulachev.

‡ These authors contributed equally to this work.

**Table S1.** Characteristics of MAGs according to the minimal standards for description of MAGs (Bowers et. al.

*Nat. Biotechnol.* **2017**, *35*, 725–731. <https://www.nature.com/articles/nbt.3893>).

| <i>Thiotrichaceae</i> sp. GKL-01 |                                                        |
|----------------------------------|--------------------------------------------------------|
| <b>General genome metadata</b>   |                                                        |
| analysis project type            | metagenome-assembled genome (MAG)                      |
| taxa id                          | multi marker approach                                  |
| assembly software                | Flye v. 2.9                                            |
| annotation                       | NCBI Prokaryotic Genome Annotation Pipeline (PGAP)     |
| <b>Genome quality</b>            |                                                        |
| assembly quality                 | Finished: single 3,251,546 bp long contiguous sequence |
| completeness score               | High Quality Draft: 100%                               |
| contamination score              | High Quality Draft: 0.6%                               |
| completeness software            | CheckM2 v. 1.0.1                                       |
| number of contigs                | 1                                                      |
| 16S recovered                    | yes                                                    |
| 16S recovery software            | NCBI Prokaryotic Genome Annotation Pipeline (PGAP)     |
| <b>MAG metadata</b>              |                                                        |
| bin parameters                   | kmer+coverage                                          |
| binning software                 | MetaBAT v.2.15                                         |

| <i>Thiothrix</i> sp. GKL-02    |                                                        |
|--------------------------------|--------------------------------------------------------|
| <b>General genome metadata</b> |                                                        |
| analysis project type          | metagenome-assembled genome (MAG)                      |
| taxa id                        | multi marker approach                                  |
| assembly software              | Flye v. 2.9                                            |
| annotation                     | NCBI Prokaryotic Genome Annotation Pipeline (PGAP)     |
| <b>Genome quality</b>          |                                                        |
| assembly quality               | Finished: single 4,277,058 bp long contiguous sequence |
| completeness score             | High Quality Draft: 100%                               |
| contamination score            | High Quality Draft: 0.71%                              |
| completeness software          | CheckM2 v. 1.0.1                                       |
| number of contigs              | 1                                                      |
| 16S recovered                  | yes                                                    |
| 16S recovery software          | NCBI Prokaryotic Genome Annotation Pipeline (PGAP)     |
| <b>MAG metadata</b>            |                                                        |
| bin parameters                 | kmer+coverage                                          |
| binning software               | MetaBAT v.2.15                                         |

| dDDH   | CT3  | KT   | BL   | AS   | Ku-5 | G1   | STA  | A1   | JP2  | Q    | RT   | SSD2 | A52  | 207  | GKL-02 | GKL-01 |
|--------|------|------|------|------|------|------|------|------|------|------|------|------|------|------|--------|--------|
| CT3    | 100  | 33,5 | 27,9 | 27,6 | 40,1 | 36   | 22,6 | 35,1 | 23,7 | 32,6 | 30,5 | 22,3 | 38,9 | 21,5 | 29,7   | 13,8   |
| KT     | 33,5 | 100  | 27,8 | 28,8 | 48,7 | 36,4 | 21,7 | 33,8 | 23,6 | 33,5 | 27,7 | 22,9 | 33,8 | 21,5 | 29,3   | 18,9   |
| BL     | 27,9 | 27,8 | 100  | 56,4 | 27,7 | 28   | 26,2 | 27,8 | 23,9 | 28,8 | 24,9 | 22,4 | 27,7 | 26,4 | 28,2   | 20     |
| AS     | 27,6 | 28,8 | 56,4 | 100  | 28,5 | 28,6 | 26,7 | 28,2 | 24,7 | 28,6 | 25,3 | 22,6 | 27,4 | 26,6 | 28,9   | 21,8   |
| Ku-5   | 40,1 | 48,7 | 27,7 | 28,5 | 100  | 38,5 | 27,3 | 36,7 | 23,6 | 34,7 | 27,9 | 22,4 | 35,9 | 27,3 | 40,4   | 21,8   |
| G1     | 36   | 36,4 | 28   | 28,6 | 38,5 | 100  | 27,3 | 37,3 | 23,8 | 32,9 | 30,2 | 22,7 | 35   | 28,4 | 57,3   | 19,7   |
| STA    | 22,6 | 21,7 | 26,2 | 26,7 | 27,3 | 27,3 | 100  | 28,6 | 23,8 | 27,5 | 26   | 22,3 | 26,7 | 21,8 | 17,3   | 17,7   |
| A1     | 35,1 | 33,8 | 27,8 | 28,2 | 36,7 | 37,3 | 28,6 | 100  | 23,4 | 34,2 | 30,5 | 23   | 46,9 | 28,9 | 36     | 20     |
| JP2    | 23,7 | 23,6 | 23,9 | 24,7 | 23,6 | 23,8 | 23,8 | 23,4 | 100  | 23,7 | 25,6 | 27,3 | 24,6 | 28,4 | 26     | 19,7   |
| Q      | 32,6 | 33,5 | 28,8 | 28,6 | 34,7 | 32,9 | 27,5 | 34,2 | 23,7 | 100  | 27,9 | 22,3 | 31,9 | 26,6 | 33,8   | 21,6   |
| RT     | 30,5 | 27,7 | 24,9 | 25,3 | 27,9 | 30,2 | 26   | 30,5 | 25,6 | 27,9 | 100  | 24,9 | 21,3 | 27,4 | 28,5   | 24,3   |
| SSD2   | 22,3 | 22,9 | 22,4 | 22,6 | 22,4 | 22,7 | 22,3 | 23   | 27,3 | 22,3 | 24,9 | 100  | 32,3 | 25,6 | 22,7   | 21,4   |
| A52    | 38,9 | 33,8 | 27,7 | 27,4 | 35,9 | 35   | 26,7 | 46,9 | 24,6 | 31,9 | 21,3 | 32,3 | 100  | 27,6 | 36,3   | 22,1   |
| 207    | 21,5 | 21,5 | 26,4 | 26,6 | 27,3 | 28,4 | 21,8 | 28,9 | 28,4 | 26,6 | 25,6 | 25,6 | 27,6 | 100  | 21,5   | 16,6   |
| GKL-02 | 29,7 | 29,3 | 28,2 | 28,9 | 40,4 | 57,3 | 17,3 | 36   | 26   | 33,8 | 27,4 | 22,7 | 36,3 | 21,5 | 100    | 20,8   |
| GKL-01 | 13,8 | 18,9 | 20   | 21,8 | 21,8 | 19,7 | 17,7 | 20   | 19,7 | 21,6 | 21,4 | 21,4 | 22,1 | 16,6 | 20,8   | 100    |

**Figure S1.** Heatmap of pairwise dDDH values for the assembled genomes of *Thiothrix*. *T. winogradskyi* CT3<sup>T</sup> (GCA\_021650935.1); '*Ca. Thiothrix sulfatifontis*' KT (GCA\_022828425.1); *T. lacustris* BL<sup>T</sup> (GCF\_000621325.1); *T. litoralis* AS<sup>T</sup> (GCF\_017901135.1); *T. subterranea* Ku-5<sup>T</sup> (GCF\_016772315.1); *T. caldifontis* G1<sup>T</sup> (GCF\_900107695.1); *T. unzii* A1<sup>T</sup> (GCA\_017901175.1); *T. nivea* JP2<sup>T</sup> (GCF\_000260135.1); *T. fructosivorans* Q<sup>T</sup> (GCA\_017349355.1); *Ca. Thiothrix moscovensis* RT (GCA\_016292235.1); *Ca. Thiothrix singaporensis* SSD2 (GCA\_013693955.1); *Ca. Thiothrix anitrata* A52 (GCF\_017901155.1); *Thiothrix* sp. 207 (GCA\_018813855.1); *Thiothrix* sp. STA\_22 (GCA\_028714775.1); *Thiothrixaceae* sp. GKL-01 (GCA\_029972135.1); *Thiothrix* sp. GKL-02 (GCA\_029972225.1).

---

### Text S1. Accession numbers of the subunit c gene of F<sub>0</sub>F<sub>1</sub>-ATPases

The gene accession numbers retrieved from UniProtKB and NCBI were as follows: *Thiothrix lacustris* BL - A0A1Y1QH02\_9GAMM and A0A1Y1QMK8\_9GAMM, *Thiothrix litoralis* AS - WP\_210224368.1 and QTR46012.1, *Thiothrix winogradskyi* CT3 - WP\_236501573.1 and UJS24521.1, *Thiothrix unzii* A1 - WP\_210218492.1 and WP\_210219344.1, *Thiothrix fructosivorans* Q - A0A8B0SKJ4\_9GAMM and QTX11484.1, *Leucothrix arctica* IMCC 9719 - WP\_109826210.1 and WP\_109824171.1, *Leucothrix mucor* DSM 2834 - WP\_022954344.1 and A0A7V2WW86\_LEUMU, *Leucothrix pacifica* XH 122 - A0A317COL7\_9GAMM and A0A317CP54\_9GAMM, *Cocleimonas flava* KMM 3898 - WP\_131905866.1 and A0A4V2P7R0\_9GAMM, *Thiolinea eikelboomii*-AP3 - A0A1T4XYD5\_9GAMM, uncultured *Thiotrichaceae* bacterium - CAA6810787.1, *Ca. Thiothrix anitrata* A52 - QTR51456.1, '*Ca. Thiothrix sulfatifontis*' KT - UOG92218.1, *Thiothrix subterranea* Ku-5 - WP\_202716014.1, '*Ca. Thiotrichaceae* bacterium' GKL-01 - WGZ91550.1, *Thiothrix caldifontis* G1 - WP\_093066078.1, *Thiothrix nivea* JP2 - WP\_002709454.1, *Ca. Thiothrix singaporensis* SSD2 - QLQ34252.1, *Beggiatoa leptomitiformis* D-402 - WP\_201800170.1, *Beggiatoa alba* B18LD - I3CK18\_9GAMM, *Thioflexithrix pseupsensis* KCTC 62399 - WP\_086489165.1, *Thermotoga maritima* DSM 3109 - Q9X1V0|ATPL\_THEMEA, *Ilyobacter tartaricus* DSM 2382 - Q8KRV3|ATPL\_ILYTA, *Propionigenium modestum* DSM 2376 - CAA37840.1. ATPase genes of the following species were retrieved from the corresponding genomes in the RAST database using BLAST: *Thiothrix* sp. GKL-02 ('*Ca. Thiothrix putei*' GKL-02) - GCA\_029972225.1, *Thiothrix* sp. STA\_22 - GCA\_028714775.1, *Thiofilum flexile* DSM 14609 - GCF\_000380185.1, *Thiolinea disciformis* B31 - GCF\_000371925.1, *Ca. Thiothrix moscovensis* RT - GCA\_016292235.1, *Thiothrix* sp. SSD2 (*Ca. Thiothrix singaporensis* SSD2) - GCA\_013693955.1, *Thiothrix* sp. 207 - GCA\_018813855.1.

### Text S2. Accession numbers of the membrane PPase gene *hppA*

*Cocleimonas flava* KMM 3898 - WP\_131904771.1, *Ca. Thiothrix moscovensis* RT - MBJ6611069.1, *Methylophaga thiooxydans* DSM 22068 - A0A0A0BCX4\_9GAMM, *Methylophaga frappieri* DSM 25690 - WP\_014705011.1, *Methylophaga marina* DSM 5689 - WP\_286304297.1, *Methylophaga sulfidovorans* DSM 11578 - A0A1I3ZW22\_9GAMM, *Methylophaga aminisulfidovorans* SK1 MP - F5T014\_9GAMM, *Methylophaga thalassica* DSM 5690 - WP\_284722875.1, *Beggiatoa leptomitiformis* D-402 - A0A2N9YBH2\_9GAMM, *Beggiatoa alba* B18LD - WP\_002682680.1, *Thioflexithrix pseupsensis* (*Thioflexithrix pseupsensis* KCTC 62399) - A0A251XAU4\_9GAMM, *Thiothrix subterranea* Ku-5 - WP\_202715708.1, *Thiothrix nivea* JP2 DSM 5205 - WP\_002709561.1, *Thiothrix caldifontis* G1 - WP\_093064126.1, *Ca. Thiothrix singaporensis* SSD2 - QLQ33052.1, *Thiothrix fructosivorans* Q - WP\_207251832.1, *Thiothrix litoralis* AS - WP\_210221415.1, *Thiothrix unzii* A1 - WP\_210218856.1, *Ca. Thiothrix anitrata* A52 - WP\_228292382.1, *Thiothrix winogradskyi* CT3 - WP\_236500955.1, '*Ca. Thiothrix sulfatifontis*' KT - UOG93112.1, *Leucothrix mucor* DSM 2157 - A0A7V2T1F4\_LEUMU, *Azospirillum lipoferum* DSM 1691 (strain 4B) - A0A5A9GUE1\_AZOLI, *Azospirillum thermophilum* CFH 70021 - A0A2S2CQR0\_9PROT. PPase genes (*hppA*) of the following species were retrieved from the corresponding genomes in the RAST database using BLAST: *Thiothrix* sp. GKL-02 ('*Ca. Thiothrix putei*' GKL-02) - GCA\_029972225.1, *Thiothrix* sp. 207 - GCA\_018813855.1.
